# Supplementary material for: Core muscle endurance and psychosocial factors affecting functional mobility in chronic low back pain: cross-sectional results
Source: PeerJ. 2025 Dec 19;13:e20372. doi: 10.7717/peerj.20372 (PMC12721122; doi:10.7717/peerj.20372)
Supplement: Supplemental Information 1 [file peerj-13-20372-s001.xlsx]

## Sheet: Raw_Data
Age	Gender	BMI	Duration_Pain_Months	VAS	ODI	PCS	FABQ	Plank_Endurance_s	Side_Bridge_Endurance_s	Back_Extensor_Endurance_s	TUG_s	5TSTS_s
50.56	Male	24.08	34.39	5.73	4.17	26.01	25.12	28.28	32	66.75	8.29	15.82
43.86	Male	25.67	24.4	6.65	25.2	14.31	29.77	70.51	32.79	67.77	9.29	14.01
52.15	Male	29.59	15.8	7.12	42.46	18.14	23.74	46.6	34.34	70.95	8.52	13.62
61.37	Male	22.53	28.32	2.82	32.66	24.54	31.09	65.4	34.77	67.45	6.69	12.71
42.85	Male	27.56	26.04	1.86	39.87	13.73	19.25	53.26	44.29	87.83	10.32	13.1
42.85	Male	31.29	19.11	8.44	27.62	25.96	33.66	55.05	35.88	110.69	8.06	10.28
61.96	Male	21.23	24.92	6.23	36.3	19.93	40.32	56.82	44.35	59.93	8.27	9.72
53.41	Male	27.42	20.97	3.7	33.25	19.08	20.41	54.91	34.23	45.03	6.76	11.44
40.37	Male	27.68	25.29	9.08	49.88	25.94	19.79	57.96	36.21	68.53	7.58	11.09
51.04	Male	29.48	30.05	5.72	38.41	24.26	33.99	68.72	10.35	117.46	6.84	10.49
40.44	Male	22.51	38.06	8.21	39.45	19.17	34.94	50.97	46.64	55.41	8.03	12.93
40.41	Male	22.22	13.58	5.61	30.04	28.78	19.21	59	39.54	100.21	11.18	13.48
47.87	Male	28.58	42.8	10.27	29.09	14.62	19.98	46.48	47.66	100.92	6.03	11.64
25.15	Male	27.8	7.39	9.56	29.78	25.34	21.01	70.46	-0.83	60	5.63	14.58
27.14	Male	27.64	22.99	4.87	40.16	25.2	13.06	37.29	61.23	80.59	10.78	9.03
39.39	Male	27.98	29.41	7.72	29.92	19.49	16.25	76.11	33.49	100.01	7.97	11.04
34.64	Male	24.43	26.75	6.96	38.85	23.51	15.61	47.26	49.03	63.2	7.2	9.93
48.63	Male	27.58	18.91	8.65	61.28	13.54	17.38	25.47	22.28	66.42	10.06	7.49
35.75	Male	27.79	22.51	3.19	46.15	27.29	22.86	49.9	42.86	59.48	7.31	11.27
30.43	Male	24.32	20.04	7.06	31.12	20.28	24.87	37.22	22.11	51.54	11.37	11.19
60.77	Male	33.22	19.2	7.93	50.3	18.15	34.72	61.06	27.46	58.24	9.45	14.66
42.94	Male	28.41	31.68	1.33	30.08	28.08	15.65	37.66	59.06	47.7	7.51	12.79
46.03	Male	22.67	27.41	2.68	9.61	17	30.48	40.9	32.86	70.78	11.92	9.28
30.3	Male	29.05	18.3	0.68	22.55	12.55	21.52	18.28	37.94	56.03	7.31	15.38
39.58	Male	23.42	32.11	4.82	11.71	11.61	22.75	40.8	46.06	74.44	9.56	14.04
46.49	Male	29.5	26.97	7.13	30.79	25.28	28.17	9.91	41.4	41.61	8.82	12.68
33.19	Male	30.78	31.36	8.97	35.44	13.36	14.72	23.07	37.1	76.22	10.49	10.97
49.28	Male	23.95	29.77	5.62	56.27	32.54	25.98	59.81	39.77	85.44	10.93	9.42
38.99	Male	30.1	17.12	9.26	39.32	8.29	24.37	60.2	65.15	33.58	8.37	10.66
42.25	Male	28.2	19.45	2.22	32.46	32.17	26.8	54.56	34.51	77.01	7.06	13.76
38.98	Male	29.62	30.79	1.46	45.63	22.78	25.28	32.74	37.73	92.67	9.09	15.45
64.84	Male	33.32	29.6	5.32	7.44	20.84	41.49	47.14	48.31	47.97	7.19	14.72
45.18	Male	25.93	24.13	6.35	38.17	18.01	18.35	47.83	48.99	100.82	11.68	10.41
34.17	Male	24.18	25.33	5.37	44.89	23.97	19.15	29.74	50.01	77.83	8.55	9.08
53.99	Male	23.71	35.39	0.61	16.64	21.21	18.46	71.45	43.18	57.22	7.71	11.75
32.45	Male	23.97	19.18	5.24	49.58	28.42	18.97	61.64	21	69.13	8.63	7.7
47.52	Male	26.51	29.05	2.4	39.46	22.17	18.35	44.43	55.57	80.39	6.07	12.14
24.67	Male	27.96	22.56	7.02	29.99	22.4	32.01	48.31	20.96	71.54	6.7	11.14
31.32	Male	27.73	22.42	6.31	43.16	19.15	33.75	51.16	39	80.03	10.32	10.46
47.39	Male	29.63	33.84	3.25	63.73	21.09	18.85	15.9	25.84	53.26	7.22	8.07
53.1	Male	26.82	31.47	4.25	37.49	23.4	16.89	44.02	34.43	73.26	6.57	12.54
47.13	Male	31.79	31.36	2.97	38.33	10.64	26.65	37.2	39.32	44.22	9.22	10.32
44.1	Male	25.87	35.63	5.3	29.44	12.93	18.99	32.19	39.23	68.11	10.3	8.97
42.15	Male	36.16	24.49	7.69	24.54	26.15	27.85	43.49	40.48	53.57	9.52	5.36
29.74	Male	28.94	30.22	3.14	45.64	22.53	24.64	76.06	55.32	56.66	9.98	11.39
37.73	Male	23.82	21.62	6.63	24.46	20.29	11.78	57.93	40.88	92.82	7.06	15.21
40.46	Male	23.09	27.12	4.21	36.11	21.57	34.7	38.94	32.19	90.16	5.95	14.97
56.46	Male	28.44	23.18	3.59	29.21	23.65	36.55	56.86	47.23	81.32	10.83	10.48
48.94	Male	26.01	25.15	5.2	41.23	18.04	18.54	69.82	50.04	50.12	7.78	10.17
26.74	Male	29.24	29.47	3.03	39.4	16.53	20.22	62.38	19.95	64.35	7.9	12.44
48.74	Male	28.41	17.22	4.15	48.24	22.69	25.26	48.82	42.67	92.4	10.54	9.33
41.26	Male	26.53	42.45	2.65	28.8	15.27	25.62	37.75	43.96	72.75	9.25	12.09
38.19	Male	23.86	15.59	10.05	31.82	24.03	28.05	58.83	31.53	112.69	9.08	13.07
51.77	Male	21.55	13.78	5.53	22.92	10.69	38.16	54.06	52.36	77.36	11.94	14.05
56.19	Male	25.24	34.35	3.81	29.63	27.95	21.8	61.92	33.36	73.67	7.25	11.24
55.14	Male	29.73	31.17	5.95	39.95	24.44	17.15	57.84	36.79	64.48	9.87	11.02
36.47	Male	27.52	29.72	5.19	44.72	23.07	12.8	64.34	33.08	72.6	8.42	9.59
42.06	Male	22.48	29.76	4.93	23.63	27.66	17.65	39.5	35.42	67.35	8.77	9.7
48.81	Male	27.38	24.2	6.89	46.13	31.98	22.87	68.53	21.58	83.14	10.87	10.97
55.6	Male	28.11	16.53	7.22	52.24	27.86	36.54	50.99	17.3	87.7	9.17	12.23
40.27	Male	23.73	24.97	4.21	40.4	9.82	19.25	80.41	55.08	55.73	9.22	13.39
43.36	Male	27.31	18.44	4.1	58.78	13.36	24.79	37.09	24.69	45.74	10.11	9.75
33.66	Male	26.98	32.76	4.81	25.49	17.5	23	75.09	22.89	36.47	7.71	14.61
32.71	Male	22.84	23.04	0.06	19.58	21.61	32.01	50.99	8.42	79.47	6.92	10.88
53.88	Male	28.01	17.15	1.9	12.87	24.72	42.02	37.68	27.27	49.91	6.58	11.4
59.61	Female	28.71	21.52	8.65	54	16.86	19.15	40.31	18.76	30.67	5.04	9.87
44.56	Female	30.52	27.89	9.3	43.43	22.63	19.46	42.87	55.67	77.28	11.75	6.31
55.9	Female	30.42	19.42	4.87	34.51	16.68	30.93	54.54	47.8	115.87	6.48	13.32
49.13	Female	22.03	17.18	6.8	38.73	17.59	28.22	56.08	26.66	70.04	7.95	13.01
38.52	Female	23.54	26.42	6.18	21.07	12.56	36.93	38.9	63.27	85.53	7.86	10.85
49.13	Female	28.56	26.43	12.65	65.93	15.62	27.49	47.51	47.45	71.65	8.83	11.59
61.53	Female	28.55	19.91	8.07	36.83	12.91	20.43	81.46	31.19	68.34	9.68	12.54
44.94	Female	28.56	20.23	5.15	36.58	15.28	27.54	74.96	4.11	87.01	9.76	8.14
61.81	Female	40.07	26.32	3.21	44.33	28.11	31.41	54.73	63.75	64.83	7.35	10.33
17.71	Female	28.75	11.76	1.69	41.25	15.45	29.26	48.49	17.93	75.05	8.04	13.13
53.98	Female	30.7	12.11	5.93	38.02	38.09	26.91	49.77	14.74	76.05	8.79	8.79
46.24	Female	30.07	18.08	3.68	25.28	24.57	31.1	57.5	47.96	57.9	7.9	12.07
42.17	Female	29.03	22.46	2.12	41.13	22.62	31.87	31.86	65.6	88.34	11	8.57
46.29	Female	25.69	27.01	3.94	58.85	16.03	33.46	43.86	52.46	66.94	9.14	12.44
24.37	Female	29.4	37.1	2.92	52.11	25.88	27.97	21.74	42.25	56.29	9.55	11.37
43	Female	24.11	31.75	9.4	55.22	17.81	21.87	54.15	42.63	79.99	9.43	8.03
49.08	Female	25.96	22.92	7.51	28.79	22.22	24.22	58.03	45.86	53.67	10.28	13.92
60.9	Female	25.11	24.15	5.43	22.78	37.63	32.14	40.32	44.68	70.67	8.62	9.89
39.86	Female	27.06	15.62	8.91	33.63	20.84	17.01	72.55	38.73	69.98	6.15	9.73
36.8	Female	34.77	24.15	5.63	35.91	28.71	25.88	28.68	36.53	90.07	8.99	11.88
40.03	Female	20.34	21.81	3.43	48.95	17.01	20.18	24.94	34.45	78.86	7.23	13.89
54.97	Female	29.15	27.11	9.01	13.95	21.23	23.34	51.41	25.84	69.69	7.44	9.3
48.79	Female	21.22	17.14	6.71	54.42	32.64	32.68	64.3	31.74	85.15	9.3	11.58
39.74	Female	25.15	28.81	3.02	33.23	17.49	24.55	74.28	14.15	95.65	10.39	12.36
50.73	Female	30.54	37.6	5	29.85	32.9	23.47	40.7	34.01	80.38	8.36	12.92
46.34	Female	27	23.37	3.4	22.5	25.92	12.95	64.79	22.92	70.34	8.84	11.82
55.53	Female	23.06	27.79	2.21	14.43	17.9	28.7	47.29	21.49	46.09	11.16	10.67
37.92	Female	24.31	30.29	7.62	45.55	25.45	27.95	45.18	37.47	50.62	8.72	9.7
41.87	Female	29.12	20.83	9.92	36.13	27.6	39.3	61.74	52.56	64.55	12.66	11.63
41.19	Female	24.26	26.25	2.18	19.01	25.38	20.82	58.11	46.66	58.97	9.26	9.18
29.89	Female	27.53	24.42	6.77	18.94	11.53	24.76	23.19	15.68	66.72	5.38	5.26
48.44	Female	26.94	25.16	3.93	30.99	16.85	24.99	71.03	22.91	71.19	9.58	12.38
48.07	Female	24.53	17.61	4.31	56.17	19.89	34.92	69.52	46.94	79.86	8.96	13.37
45.37	Female	34.18	24.52	4.06	31.95	20.98	22.41	38.09	23	68.86	10.47	6.44
42.85	Female	28.97	28.63	3.43	16.33	25.37	25.21	54.09	32.43	79.07	9.44	9.31
30.4	Female	19.79	36.89	5.56	32.12	22.57	27.67	55.63	42.08	71.33	8.09	12.76
40.89	Female	27.42	32.63	3.51	31.78	13.01	24.52	51.97	23.17	33.92	6.28	15.81
41.71	Female	24.5	42.98	6.08	1.34	23.85	19.78	39.27	36.54	52.92	7.97	11.49
36.86	Female	29.72	17.66	5.33	34.53	25.31	24.57	37.37	18.62	67.51	6.9	9.91
43.62	Female	24.05	31.87	4.89	32.31	24.99	31.15	47.49	27.74	47.96	7.35	11.06
49.58	Female	26.38	25.9	3.33	43.95	28.28	15.44	66.27	39.21	81.15	9.3	14.36
65.2	Female	28.52	43.3	4.1	58.43	26.72	24.11	56.41	15.4	98.22	11.11	10.08
47.16	Female	29.77	17.3	7.22	49.36	24.35	17.88	42.08	40.71	92.5	8.98	9.76
48.03	Female	22.64	17.03	6.62	31.83	21.01	32.06	59.98	34.99	66.24	6.32	10.43
44.54	Female	25.63	19.11	3.16	21.31	10.95	11.73	3.25	42.11	97.49	9.06	9.43
25.1	Female	25.14	5.9	5.68	67.53	24.17	18.94	65.89	38.02	72.88	10.32	11.71
45.04	Female	24.53	19.75	7.21	35.95	22.76	25.94	20.63	52.21	63.97	7.3	14.89
45.95	Female	32.87	17.73	1.54	35.38	23.17	34.83	42.21	36.79	58.9	8.1	12.13
71.28	Female	28.18	25.61	6.72	34.91	13.38	22.63	30.34	29.88	64.6	8.34	10.92
43.29	Female	22.43	27.27	3.9	37.7	14.62	18.97	27.6	36.75	63.03	7.01	10.83
48.5	Female	29.95	40.58	6.79	33.4	28.11	37.19	66.08	41.99	73.28	9.4	8.14
44.95	Female	34.1	32.55	3.66	28	21.2	12.29	40.56	35.84	73.09	8.12	13.32
33	Female	30.34	19.31	1.23	28.34	25.76	6.67	53.32	35.74	70.21	9.02	11.28
57.37	Female	21.54	16.52	1.64	34.8	21.63	26.41	47.15	26.49	78.16	6.84	11.07
53.25	Female	25.11	28.57	5.56	28.38	21.64	19.36	55.37	26.98	91.99	7.59	18.22
53.66	Female	31.15	12.86	6.06	26.26	27.38	15.48	49.09	17.77	87.56	9.53	12.08
35.74	Female	24.34	40.19	3.33	36.55	18.19	28.42	27.79	57.01	42.92	7.7	9.86
60.11	Female	28.31	34.54	6.94	32.01	22.06	24.94	63.5	19.74	23.31	11.2	10.55
30.54	Female	29.45	20.24	1.56	54.1	18.53	18.9	40.15	26.6	87.29	7.65	13.88
51.51	Female	23.58	9.46	5.3	1.91	18.7	13.54	23.5	26.29	45.08	8.7	11.69
68.41	Female	26.57	36.05	2.62	48.92	19.5	29.65	41.18	46.37	66.03	9.88	8.4
34.88	Female	15.6	23.32	3.92	50.86	22.85	27.98	71.41	31.56	48.69	5.95	13.4
39.35	Female	23.25	35.04	5.56	9.17	18.42	22.38	61.21	50.76	37.1	5.38	10.03
46.37	Female	25.91	10.49	3.44	30.91	29.39	36.93	42.43	26.85	80.08	5.77	15.42
40.01	Female	22.48	19.11	4.55	30.54	15.8	15.12	42.42	38.7	84.07	10.43	13.74
28.98	Female	32.41	24.36	7.8	17.53	20.27	11.71	42.85	24.83	59.58	7.4	10.5
46.04	Female	21.85	24.72	4.1	25.44	18.67	17.94	80.43	61.94	22.63	12.59	14.17
34.12	Female	25.26	20.41	7.41	21.26	30.59	22.78	53.87	20.44	60.13	7.38	11.59
50.31	Female	27.23	29.71	2.81	57.22	22.69	24.94	54.63	39.09	77.34	8.63	13.26
35.63	Female	31.75	15.05	6.69	46.96	27.97	21.32	64.03	43.12	43.03	10.9	12.48
61.66	Female	21.83	23.08	8.82	51.18	12.06	25.75	51.63	40.38	73.51	11.67	9.66

## Sheet: Metadata
Variable_Name	Description	Data_Type	Units/Scale_Range	Coding_Convention	Instrument_Method
ID	Participant identifier	Nominal	N/A	Auto-generated numeric code	Internal
Age	Participant age	Continuous	Years (18–65)	Raw value	Self-report
Gender	Biological sex	Categorical	0 = Female, 1 = Male	Converted from text	Self-report
BMI	Body Mass Index	Continuous	kg/m²	Raw value	Height and weight measured
Duration_Pain_Months	Duration of chronic low back pain	Continuous	Months	Raw value	Self-report
VAS	Pain intensity	Continuous	0–10	Higher = more intense pain	Visual Analog Scale
ODI	Disability index	Continuous	0–100%	Higher = more disability	Oswestry Disability Index
PCS	Pain Catastrophizing Score	Continuous	0–52	Higher = more catastrophizing	Pain Catastrophizing Scale
FABQ	Fear-Avoidance Beliefs Score	Continuous	0–96	Higher = more avoidance	FABQ questionnaire
Plank_Endurance_s	Plank hold time	Continuous	Seconds	Raw stopwatch time	Plank test
Side_Bridge_Endurance_s	Side-bridge hold time	Continuous	Seconds	Raw stopwatch time	Side-bridge test (avg or side specified)
Back_Extensor_Endurance_s	Back extensor hold time	Continuous	Seconds	Raw stopwatch time	Back extensor test
TUG_s	Timed Up and Go test time	Continuous	Seconds	Lower = better mobility	TUG test
5TSTS_s	Five Times Sit-to-Stand test time	Continuous	Seconds	Lower = better mobility	5TSTS test

## Sheet: README
Item	Description
Study Title	Core Muscle Endurance and Psychosocial Factors in Chronic Low Back Pain
Purpose	This dataset provides anonymized data for 136 participants in a study on the relationship between core muscle endurance, psychosocial factors, and functional mobility in CLBP patients.
File Description	Includes raw data and detailed metadata for each variable.
Missing Value Code	NA (missing values are coded as 'NA')
Version	1.0
Date	September 2025
Contact	rshankar@kku.edu.sa (Corresponding Author: Dr. Ravi Shankar Reddy)
